# Supplementary material for: Comprehensive profiling of immune-related genes in soft tissue sarcoma patients
Source: J Transl Med. 2020 Sep 1;18:337. doi: 10.1186/s12967-020-02512-8 (PMC7465445; doi:10.1186/s12967-020-02512-8)
Supplement: Supplementary file 2 — Additional file 2: The list of 57 overall survival-related differentially expressed immune-related genes. [file 12967_2020_2512_MOESM2_ESM.xls]

id	HR	HR.95L	HR.95H	pvalue
IL32	0.830828948254325	0.715352584650777	0.964946176289233	0.0152113281155956
LYZ	0.882352237733155	0.787152806972148	0.989065229186501	0.0316567977401788
STAT1	0.746192301442665	0.594855277741865	0.936030949991712	0.011354796055646
ACVR1C	2.60324667747952	1.04536036564241	6.48282973656031	0.0398539604516563
PROCR	0.844626910162997	0.726842118588875	0.981498731466619	0.0275474209547647
HLA-H	0.836695727075824	0.701038156496453	0.998604331618123	0.0482184348115515
FABP5	1.22507395875626	1.0009420731565	1.49939366589907	0.0489418698041836
JUND	0.744036217585653	0.579484606193294	0.955314234688245	0.0204257771052228
ZYX	0.803445777445695	0.647264841769455	0.997312190680122	0.0472147932129036
LTB	0.822563172966879	0.690147378293905	0.980385052239088	0.0291706201589497
CDC42	1.64116087987213	1.09267397333585	2.46497042974298	0.0169865523536563
RAF1	1.7017375382178	1.02963177612488	2.81256922730048	0.0380911154253558
IFIH1	0.565321124492114	0.434195006303034	0.736047096713917	2.2751161305347e-05
RARB	1.22796551902841	1.04020455757449	1.44961806304596	0.0152860543929609
PLXNA1	1.36153786962633	1.06256523857626	1.74463204999111	0.014699130569468
SLC40A1	0.813860663175109	0.692263791356456	0.956816154960161	0.0126088749900791
ACTG1	1.62781284401808	1.20838223535398	2.19282821083017	0.0013502732138904
NENF	0.676655830348415	0.509633336865367	0.898416723601148	0.00692110050925294
NRG4	2.05281855828956	1.09982875560531	3.83156378825425	0.0238950316437066
RBP4	1.14188663188197	1.02832032883513	1.26799504347813	0.0130474376362554
HMGB1	1.67371357348969	1.06038356806245	2.64179605423559	0.0269846468294769
PIK3R2	1.75575541680099	1.06614265253204	2.8914302193096	0.0269941856028611
SEMA3G	0.759787834257031	0.607599270828401	0.950095862192081	0.0160031482984583
PSMD10	2.02477146656637	1.20874451509752	3.39170059563048	0.00735684391997438
VEGFA	1.2326812098809	1.00357300506347	1.51409310287032	0.0461563998343943
RARRES3	0.760709011165361	0.657293863204471	0.880394952794753	0.000243856501778947
NUDT6	2.05935706761368	1.27629484151934	3.32286192341092	0.00308254534379696
NRAS	1.60820985879859	1.12160862911334	2.30591926881086	0.00976170433286377
FGF11	1.44006264305642	1.07363400826352	1.93155246570547	0.0149246972674878
ADAR	0.717437477169877	0.537995476085216	0.956730226419875	0.0237489753550927
ILK	0.753454390544817	0.598754223346461	0.948124449892644	0.0157669725517646
ADM	1.17246913325452	1.00066446949302	1.37377103948847	0.0490472613118531
ZC3HAV1L	1.27583323514459	1.01335517903475	1.60629804591319	0.0381858050697963
PTGER4	0.807745781408171	0.665882904640728	0.979831803513146	0.0302556291373003
TINAGL1	0.714826136784763	0.597767300455098	0.854808226280708	0.000233909789399387
RSAD2	0.759789777695114	0.62238365245084	0.927531602118338	0.00695289852836088
ZC3HAV1	0.599196783964908	0.411894728690691	0.871671232732634	0.00740329259517244
PSMB8	0.774029735901418	0.615089252115038	0.974040807898179	0.0289436981704185
HLA-A	0.813710941180036	0.689879309344701	0.959770045031552	0.0143869077115034
SECTM1	0.730078312356881	0.613382914869874	0.86897487564835	0.00039946111804472
HLA-E	0.780754172938631	0.657393582871596	0.927263506130315	0.00479325457465868
S100A8	0.856392411211768	0.736018675259417	0.99645292522314	0.0448623937631748
APOBEC3G	0.704252450375508	0.54100563338514	0.916758501675022	0.00916282959638149
ICAM2	0.781977332750427	0.61196998339371	0.999213303803613	0.0492690171989132
IL16	0.732048683235025	0.544528453486745	0.984145587240979	0.0388463058234595
A2M	0.832142779248222	0.738108589387972	0.938156817317535	0.00266989550787421
RAC3	1.22569316019019	1.0683560506625	1.40620135207303	0.00369302072088022
SEMA7A	1.18514752900685	1.04131779320203	1.34884343154458	0.0100734889277599
HLA-C	0.79109425515748	0.660432970761659	0.947605810505517	0.0109508216409704
BPHL	1.84367939135831	1.0656123039086	3.18985965688598	0.0287304597836585
WNT5A	1.16088282944018	1.00467470182403	1.34137839963752	0.0430509477065556
CMKLR1	0.834571173018473	0.716722969598691	0.971796736503952	0.0198959819443487
TAP1	0.775710989563073	0.608612135230995	0.988688040373268	0.0401818598821807
IL6R	0.733461596134561	0.580001298525087	0.927525359636739	0.00964992657122502
IKBKB	0.629296420611666	0.424809420109197	0.932215638939596	0.0208851538373282
MAPK8	1.90601209516209	1.20675824271687	3.01044731107468	0.00567745652447943
PLCG2	0.569786571340114	0.37728346900808	0.860511428536961	0.00749144406478997
